# Supplementary material for: The geothermal gradient shapes microbial diversity and processes in natural-gas-bearing sedimentary aquifers
Source: Copernicus journal article supplement (doi:10.5194/bg-21-4273-2024), 2024-10-01
Supplement: Supplementary file 1 [file bg-21-4273-2024-supplement.pdf]

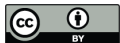

*Supplement of*

## **The geothermal gradient shapes microbial diversity and processes in natural-gas-bearing sedimentary aquifers**

**Taiki Katayama et al.**

*Correspondence to:* Taiki Katayama (katayama.t@aist.go.jp)

The copyright of individual parts of the supplement might differ from the article licence.

## Supplementary Tables

**Table S1.** Depths and water temperatures of the production wells used in this study and their analytical purposes.

| Well no.  | Sample type           | Formations          | Strainer depth<br>(average, mbgs) | Water Temp.<br>(°C) | Analysis                              |                          |             |                   |                              |
|-----------|-----------------------|---------------------|-----------------------------------|---------------------|---------------------------------------|--------------------------|-------------|-------------------|------------------------------|
|           |                       |                     |                                   |                     | Inorganic<br>and organic<br>chemistry | Stable sulfur<br>isotope | Cell counts | Molecular<br>Gene | Radiotracer<br>& cultivation |
| well 1    | Formation water       | Haizume             | 554                               | 38                  | +                                     | +                        | +           | +                 | +                            |
| well 2    | Formation water       | Haizume & Nishiyama | 653                               | 49                  | +                                     |                          |             |                   |                              |
| well 3    | Formation water       | Nishiyama           | 754                               | 51                  | +                                     |                          | +           | +                 | +                            |
| well 4    | Formation water       | Nishiyama           | 768                               | 56                  | +                                     |                          |             |                   |                              |
| well 5    | Formation water       | Nishiyama           | 883                               | 54                  | +                                     |                          |             |                   |                              |
| well 6    | Formation water       | Nishiyama           | 798                               | 57                  | +                                     |                          |             |                   |                              |
| well 7    | Formation water       | Nishiyama           | 849                               | 58                  | +                                     |                          | +           | +                 | +                            |
| well 8    | Formation water       | Nishiyama           | 845                               | 60                  | +                                     |                          |             |                   |                              |
| well 9    | Formation water       | Nishiyama           | 1049                              | 65                  | +                                     | +                        | +           | +                 | +                            |
| well 10   | Formation water       | Nishiyama           | 1115                              | 73                  | +                                     | +                        | +           | +                 | +                            |
| well 11   | Formation water       | Nishiyama           | 1373                              | 81                  | +                                     | +                        | +           | +                 | +                            |
| well 12   | Formation water       | Nishiyama           | 1374                              | 82                  | +                                     |                          |             |                   |                              |
| wells 13* | Formation water & oil | Nishiyama & Shiiya  | 1513                              | 67                  | +                                     | +                        |             |                   |                              |
| wells 14* | oil                   | Shiiya              | 1704                              | ND                  |                                       | +                        |             |                   |                              |
| wells 15* | Formation water       | Shiiya              | 1733                              | 96                  | +                                     | +                        | +           |                   |                              |

\* In oil deposits, oil and formation water was collected from several production wells and mix on the ground

**Table S2.** Analytical method for each molecule dissolved in formation water sample.

| Analytical methods                                                 | Molecules                                                                                                  |
|--------------------------------------------------------------------|------------------------------------------------------------------------------------------------------------|
| Ion chromatography                                                 | Cl <sup>-</sup> , SO <sub>4</sub> <sup>2-</sup> , Br <sup>-</sup> , formate, acetate, propionate, butyrate |
| Spectrophotometric method using naphthylethylenediamine (NEDA)     | NO <sub>2</sub> <sup>-</sup>                                                                               |
| Spectrophotometric method using copper-cadmium reduction NEDA      | NO <sub>3</sub> <sup>-</sup>                                                                               |
| Spectrophotometric method using L-ascorbic acid                    | PO <sub>4</sub> <sup>3-</sup>                                                                              |
| Atomic absorption spectrometry                                     | Na <sup>+</sup> , K <sup>+</sup> , Ca <sup>2+</sup> , Mg <sup>2+</sup>                                     |
| Spectrophotometric method using indophenol blue                    | NH <sub>4</sub> <sup>+</sup>                                                                               |
| Inductively coupled plasma (ICP) emission spectrometry             | Fe, Mn                                                                                                     |
| Combustive oxidation with non-dispersive infrared (NDIR) detection | HCO <sub>3</sub> <sup>-</sup> , TOC                                                                        |
| Spectrophotometric method using zinc acetate precipitation         | HS <sup>-</sup>                                                                                            |
| Gas chromatography mass spectrometry                               | n-alkanes                                                                                                  |
| Spectrophotometric method using 4-aminoantipyrine                  | Phenols                                                                                                    |
| Gas chromatography mass spectrometry with headspace sampler        | Methanol, toluene, xylene                                                                                  |

**Table S3.** Physicochemical characteristics of the formation water samples.

| Reservoir                           | Well no. | Depth | Temp. | pH  | ORP  | HCO <sub>3</sub> <sup>-</sup> | Cl <sup>-</sup> | SO <sub>4</sub> <sup>2-</sup> | HS <sup>-</sup> | NO <sub>2</sub> <sup>-</sup> | NO <sub>3</sub> <sup>-</sup> | PO <sub>4</sub> <sup>3-</sup> | Na <sup>+</sup> | K <sup>+</sup> | NH <sub>4</sub> <sup>+</sup> | Ca <sup>2+</sup> | Mg <sup>2+</sup> | Ba <sup>2+</sup> | Fe   | Mn   | TOC  | Formate | Acetate | Propio-<br>nate | Butyrate | Methanol | Toluene | Phenols | Xylenes | δ <sup>18</sup> O | δD     |    |    |
|-------------------------------------|----------|-------|-------|-----|------|-------------------------------|-----------------|-------------------------------|-----------------|------------------------------|------------------------------|-------------------------------|-----------------|----------------|------------------------------|------------------|------------------|------------------|------|------|------|---------|---------|-----------------|----------|----------|---------|---------|---------|-------------------|--------|----|----|
|                                     |          | mbgs  | °C    |     | mV   | mg/L                          | mg/L            | mg/L                          | uM              | mg/L                         | mg/L                         | mg/L                          | mg/L            | mg/L           | mg/L                         | mg/L             | mg/L             | mg/L             | mg/L | mg/L | mg/L | mg/L    | mM      | mM              | mM       | mM       | µM      | µM      | mg/L    | µM                | ‰      | ‰  |    |
| Gas-associated<br>aquifers          | well 1   | 554   | 38    | 7.4 | -247 | 720                           | 16000           | <5                            | <0.03           | <0.005                       | <0.005                       | 0.02                          | 9100            | 180            | 110                          | 570              | 190              | 1.5              | 4    | 0.3  | 18   | 0.001   | 0.014   | 0.01            | 0.01     | 1.82     | 0.22    | <0.2    | 0.17    | -3.83             | -14.4  |    |    |
|                                     | well 2   | 653   | 49    | 7.3 | -230 | 470                           | 19000           | 21                            | 0.9             | 0.011                        | <0.005                       | 0.044                         | 12000           | 200            | 140                          | 780              | 270              | 2.2              | 3.6  | 0.2  | 26   | 0.002   | 0.002   | 0.01            | 0.01     |          |         |         |         | -3                | -5.71  |    |    |
|                                     | well 3   | 754   | 51    | 7.4 | -181 | 420                           | 19000           | <5                            | 0.1             | <0.005                       | <0.005                       | 0.045                         | 12000           | 220            | 120                          | 850              | 200              | 2.3              | 4.5  | 0.4  | 22   | 0.001   | 0.001   | 0.01            | 0.01     | 2.15     | 0.09    | 0.3     | 0.11    | -3                | -6.09  |    |    |
|                                     | well 4   | 768   | 56    | 7.5 | -241 | 520                           | 18000           | <5                            | 0.8             | 0.01                         | <0.005                       | 0.048                         | 12000           | 180            | 100                          | 710              | 120              | 1.9              | 3.6  | 0.2  | 31   | 0.002   | 0.028   | 0.03            | 0.01     |          |         |         |         | -2.34             | -5.34  |    |    |
|                                     | well 5   | 883   | 54    | 7.3 | -230 | 490                           | 19000           | 22                            | 0.6             | 0.01                         | <0.005                       | 0.043                         | 12000           | 230            | 140                          | 830              | 180              | 2.5              | 4    | 0.2  | 22   | 0.001   | 0.002   | 0.01            | 0.01     |          |         |         |         | -3.11             | -5.95  |    |    |
|                                     | well 6   | 796   | 53    | 7.4 | -215 | 430                           | 21000           | 5                             | 1.6             | 0.01                         | <0.005                       | 0.066                         | 12000           | 180            | 120                          | 730              | 170              | 2.3              | 3.4  | 0.2  | 26   | 0.002   | 0.007   | 0.01            | 0.01     |          |         |         |         | -2.56             | -4.67  |    |    |
|                                     | well 7   | 849   | 58    | 7.6 | -267 | 500                           | 21000           | <5                            | 0.3             | <0.005                       | <0.005                       | 0.1                           | 13000           | 170            | 100                          | 700              | 110              | 1.9              | 3.8  | 0.3  | 21   | 0.001   | 0.002   | 0.01            | 0.01     | 1.76     | 0.19    | 0.3     | 0.14    | -2.87             | -5.06  |    |    |
|                                     | well 8   | 845   | 60    | 7.6 | -233 | 460                           | 21000           | <5                            | 0.8             | 0.011                        | <0.005                       | 0.104                         | 13000           | 140            | 110                          | 610              | 110              | 2.4              | 2.8  | 0.2  | 22   | 0.001   | 0.002   | 0.01            | 0.01     |          |         |         |         | -3.15             | -6.09  |    |    |
|                                     | well 9   | 1049  | 65    | 7.8 | -254 | 600                           | 20000           | 6                             | 0.4             | 0.006                        | <0.005                       | 0.27                          | 12000           | 200            | 120                          | 530              | 94               | 4.5              | 3    | 0.2  | 25   | 0.001   | 0.013   | 0.01            | 0.01     | 4.76     | 0.09    | 0.7     | 0.14    | -2.31             | -4.82  |    |    |
|                                     | well 10  | 1115  | 73    | 7.5 | -290 | 580                           | 20000           | 9                             | 2.1             | 0.009                        | <0.005                       | 0.35                          | 13000           | 140            | 100                          | 320              | 110              | 9.5              | 1.5  | 0.1  | 68   | 0.040   | 0.900   | 0.21            | 0.01     | 2.82     | 0.09    | 3.2     | 0.13    | -2.38             | -5.54  |    |    |
|                                     | well 11  | 1373  | 81    | 7.7 | -205 | 640                           | 16000           | 40                            | 2.4             | 0.007                        | <0.005                       | 0.32                          | 11000           | 130            | 87                           | 240              | 76               | 8.6              | 1.2  | <0.1 | 420  | 0.430   | 8.780   | 1.99            | 0.17     | 8.09     | 0.06    | 10.8    | 0.14    | -0.64             | -6.5   |    |    |
|                                     | well 12  | 1374  | 82    | 7.9 | -241 | 480                           | 19000           | 42                            | 3.6             | 0.021                        | <0.005                       | 0.331                         | 12000           | 140            | 140                          | 320              | 99               | 10               | 1.1  | <0.1 | 340  | 0.374   | 6.152   | 1.20            | 0.11     |          |         |         |         | -1.47             | -7.05  |    |    |
| Oil                                 | wells 13 | 1513  | 67    | nd  | nd   | 750                           | 10000           | 31                            | 0.9             | <0.005                       | <0.005                       | 0.007                         | 7500            | 82             | 64                           | 140              | 44               | 8.5              | 17   | 0.2  | 1500 | 0.1897  | 3.725   | 0.22            | nd       |          |         |         |         | -0.55             | -12.16 |    |    |
|                                     | wells 15 | 1733  | 96    | 6.7 | nd   | 560                           | 16000           | 31                            | 6.4             | <0.005                       | <0.005                       | 0.01                          | 8900            | 76             | 71                           | 200              | 48               | 12               | 75   | 0.5  | 1400 | 1.08    | 31.77   | 5.54            | 1.32     | 2.99     | 5.44    | 9       | 10.72   | 0.34              | -11.01 |    |    |
| # of replication<br>for measurement |          |       |       |     |      | 1*                            | 1*              | 1*                            | 3†              | 1*                           | 1*                           | 1*                            | 1*              | 1*             | 1*                           | 1*               | 1*               | 1*               | 1*   | 1*   | 1*   | 1*      | 1*      | 1*              | 1*       | 1*       | 1*      | 1*      | 1*      | 1*                | 1*     | 6‡ | 6‡ |

\*In the triplicate measurements of the standard sample, the standard deviation was less than 10% of the mean value.

†Standard deviations were less than 20% of each mean value.

‡Standard deviations of δD and δ<sup>18</sup>O were less than 2.0 ‰, and 0.5 ‰, respectively.

**Table S4.** Methanogen diversity based on the *mcrA* gene in the original formation water and culture samples.

|                                |               |                                              | Original formation water samples |      |                |      |      |      | Culture samples |     |                                 |      |      |      |      |  |
|--------------------------------|---------------|----------------------------------------------|----------------------------------|------|----------------|------|------|------|-----------------|-----|---------------------------------|------|------|------|------|--|
|                                |               |                                              |                                  |      |                |      |      |      | Meth/TMA        |     | H <sub>2</sub> /CO <sub>2</sub> |      |      |      |      |  |
| Depth (mbgs)                   |               |                                              | 559                              | 754  | 845            | 1049 | 1115 | 1373 | 559             | 754 | 559                             | 754  | 845  | 1049 | 1373 |  |
| Temp. (°C)                     |               |                                              | 38.2                             | 50.7 | 57.7           | 65.2 | 73   | 81.1 | 37              | 50  | 37                              | 50   | 55   | 65   | 80   |  |
| Representative clone ID in OTU | Accession no. | Related species                              | AA seq. identity (%)             |      | Proportion (%) |      |      |      |                 |     | Proportion (%)                  |      |      |      |      |  |
| N245FW2_mf24                   | LC783983      | <i>Methanobacterium vulcani</i>              | 97.9                             | 19.6 | 59.4           | 0    | 2.6  | 0    | 0               | 100 | 100                             | 0    | 0    | 0    | 0    |  |
| N103FW1_mf25                   | LC783984      | <i>Methanobacterium alkalithermotolerans</i> | 98.5                             | 47.8 | 3.1            | 25   | 52.6 | 0    | 0               | 0   | 0                               | 0    | 18.8 | 0    | 0    |  |
| N245FW2_mf32                   | LC783985      | <i>Methanothermobacter tenebrarum</i>        | 96.3                             | 0    | 15.6           | 0    | 0    | 100  | 58.6            | 0   | 0                               | 0    | 0    | 0    | 0    |  |
| N245FW2_mf25                   | LC783986      | <i>Methanobacterium ferruginis</i>           | 96.2                             | 10.9 | 21.9           | 20   | 2.6  | 0    | 0               | 0   | 0                               | 13.3 | 81.3 | 62.5 | 0    |  |
| N142FW6_mf24                   | LC783987      | <i>Methanothermobacter defluvii</i>          | 100                              | 0    | 0              | 0    | 0    | 0    | 41.4            | 0   | 0                               | 0    | 0    | 18.8 | 75   |  |
| N103FW1_mf36                   | LC783988      | <i>Methanobacterium alcaliphilum</i>         | 92.6                             | 13   | 0              | 45   | 13.2 | 0    | 0               | 0   | 0                               | 0    | 0    | 0    | 0    |  |
| N103FW1_mf27                   | LC783989      | <i>Methanocalculus alkaliphilus</i>          | 96.5                             | 4.3  | 0              | 5    | 28.9 | 0    | 0               | 0   | 0                               | 86.7 | 0    | 0    | 0    |  |
| N142F_HF_m12                   | LC783990      | <i>Methanothermobacter thermotrophicus</i>   | 99.3                             | 0    | 0              | 0    | 0    | 0    | 0               | 0   | 0                               | 0    | 0    | 18.8 | 25   |  |
| N103FW1_mf37                   | LC783991      | <i>Methanobacterium alkalithermotolerans</i> | 94.7                             | 4.3  | 0              | 5    | 0    | 0    | 0               | 0   | 0                               | 0    | 0    | 0    | 0    |  |

Abbreviation: Meth, methanol; TMA, trimethylamine; AA, amino acids.

Supplementary Figures

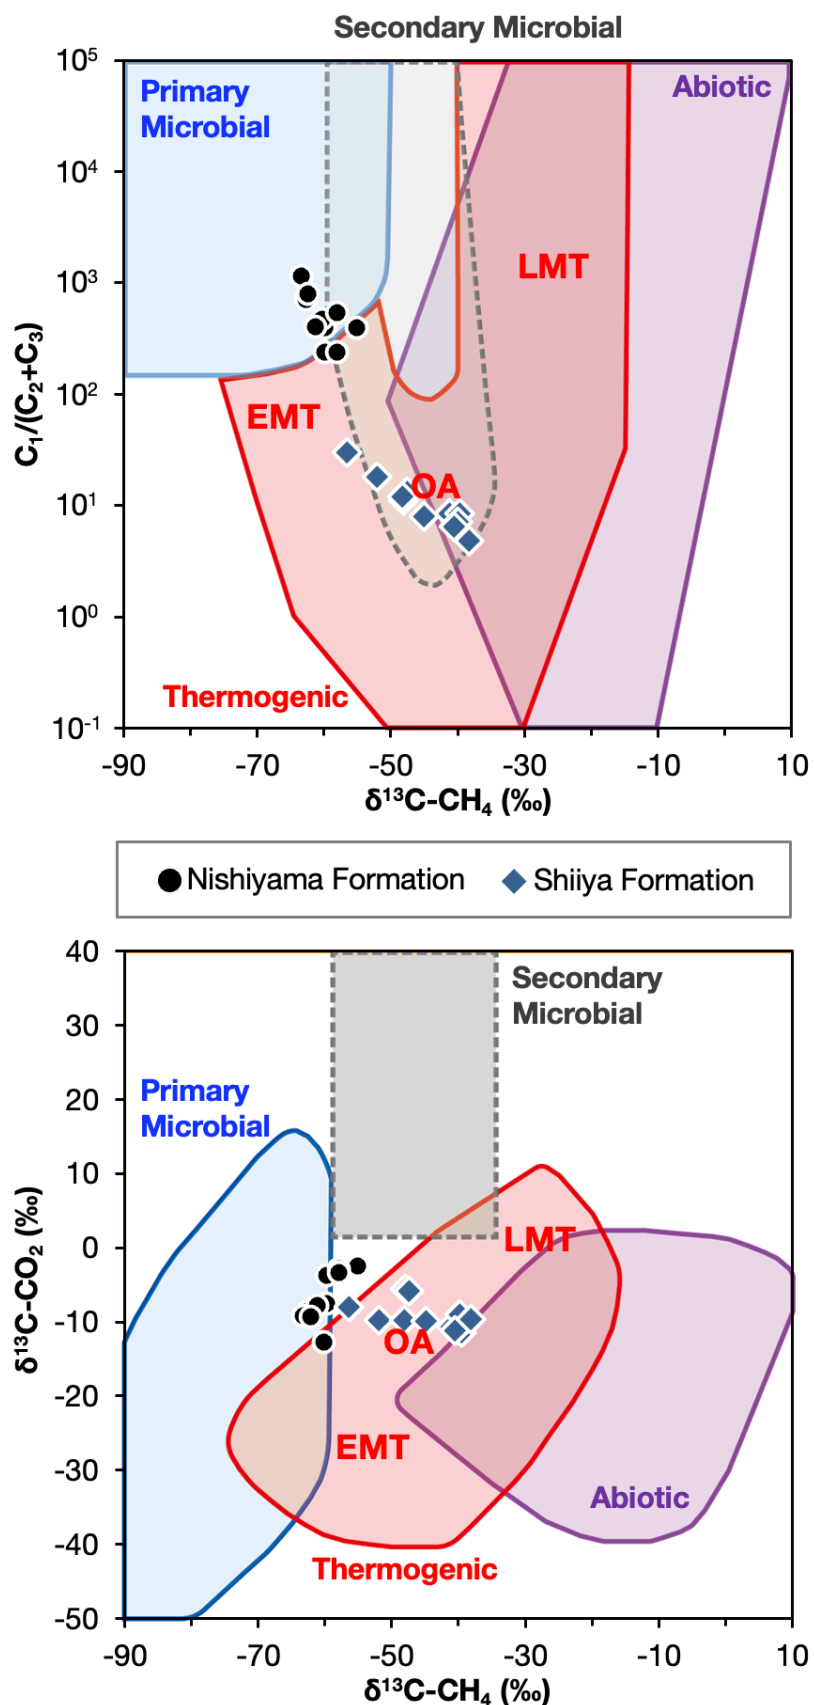

**Fig. S1.** Genetic diagram of  $\delta^{13}C-CH_4$  versus  $CH_4/(C_2H_6 + C_3H_8)$  (upper) and  $\delta^{13}C-CH_4$  versus  $\delta^{13}C-CO_2$  (lower) of gas samples from the Nishiyama and Shiya Formations. The deduced origin of gas is based on Milkov and Etiope (2018). Abbreviations: EMT, early mature thermogenic gas; OA, oil-associated thermogenic gas; LMT, late mature thermogenic gas.

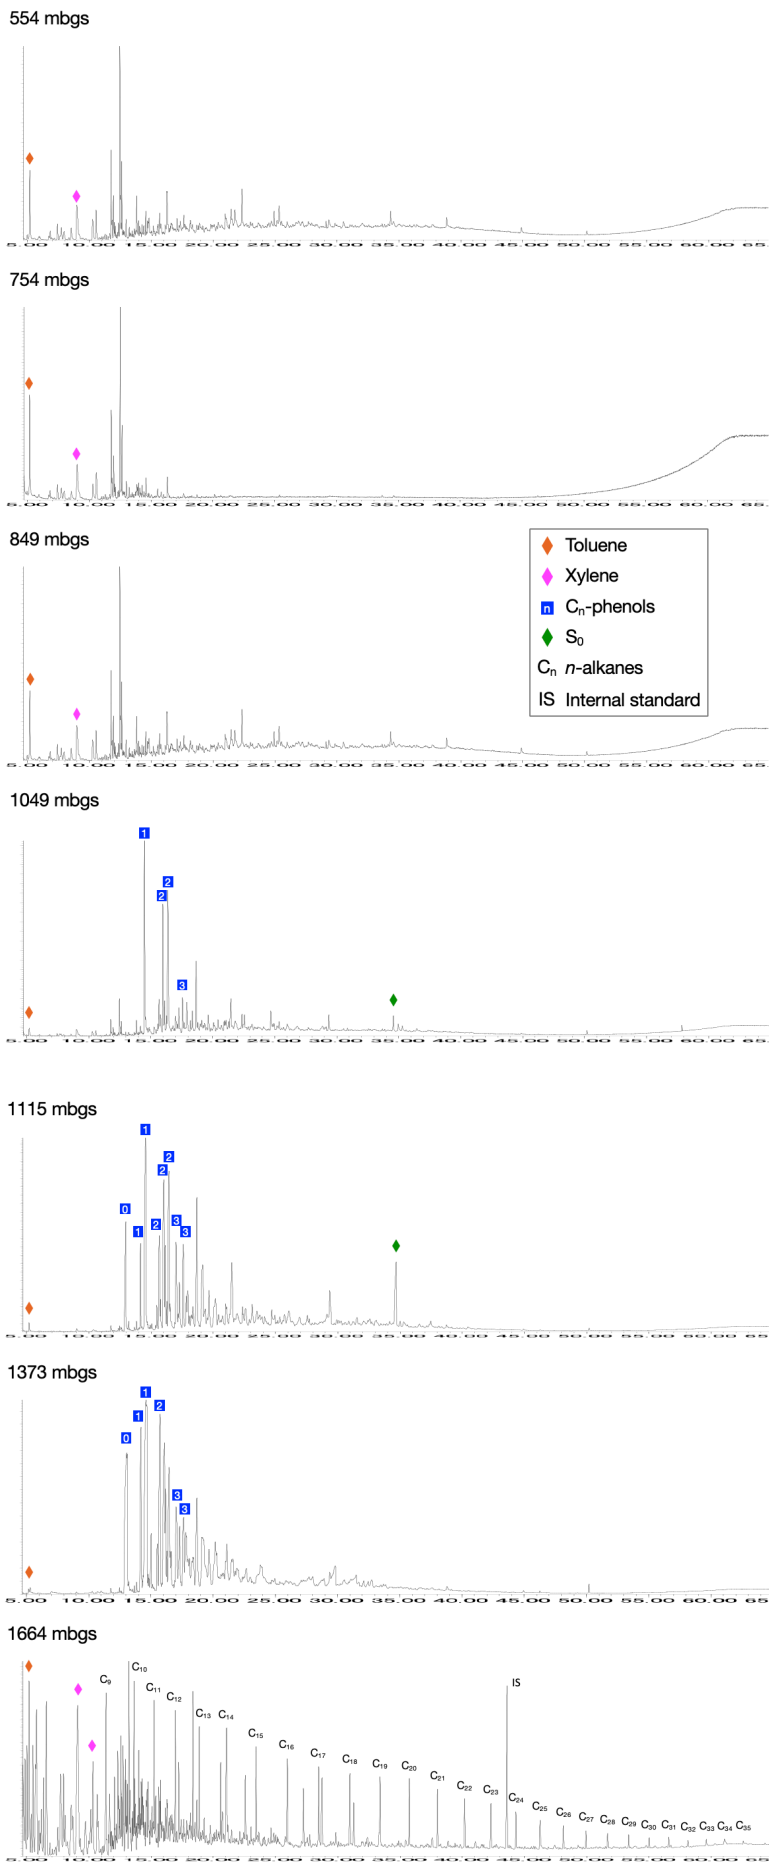

**Fig. S2.** GC-MS chromatograms of hydrocarbons and phenols in formation water samples and oil sample (1664 mbgs).

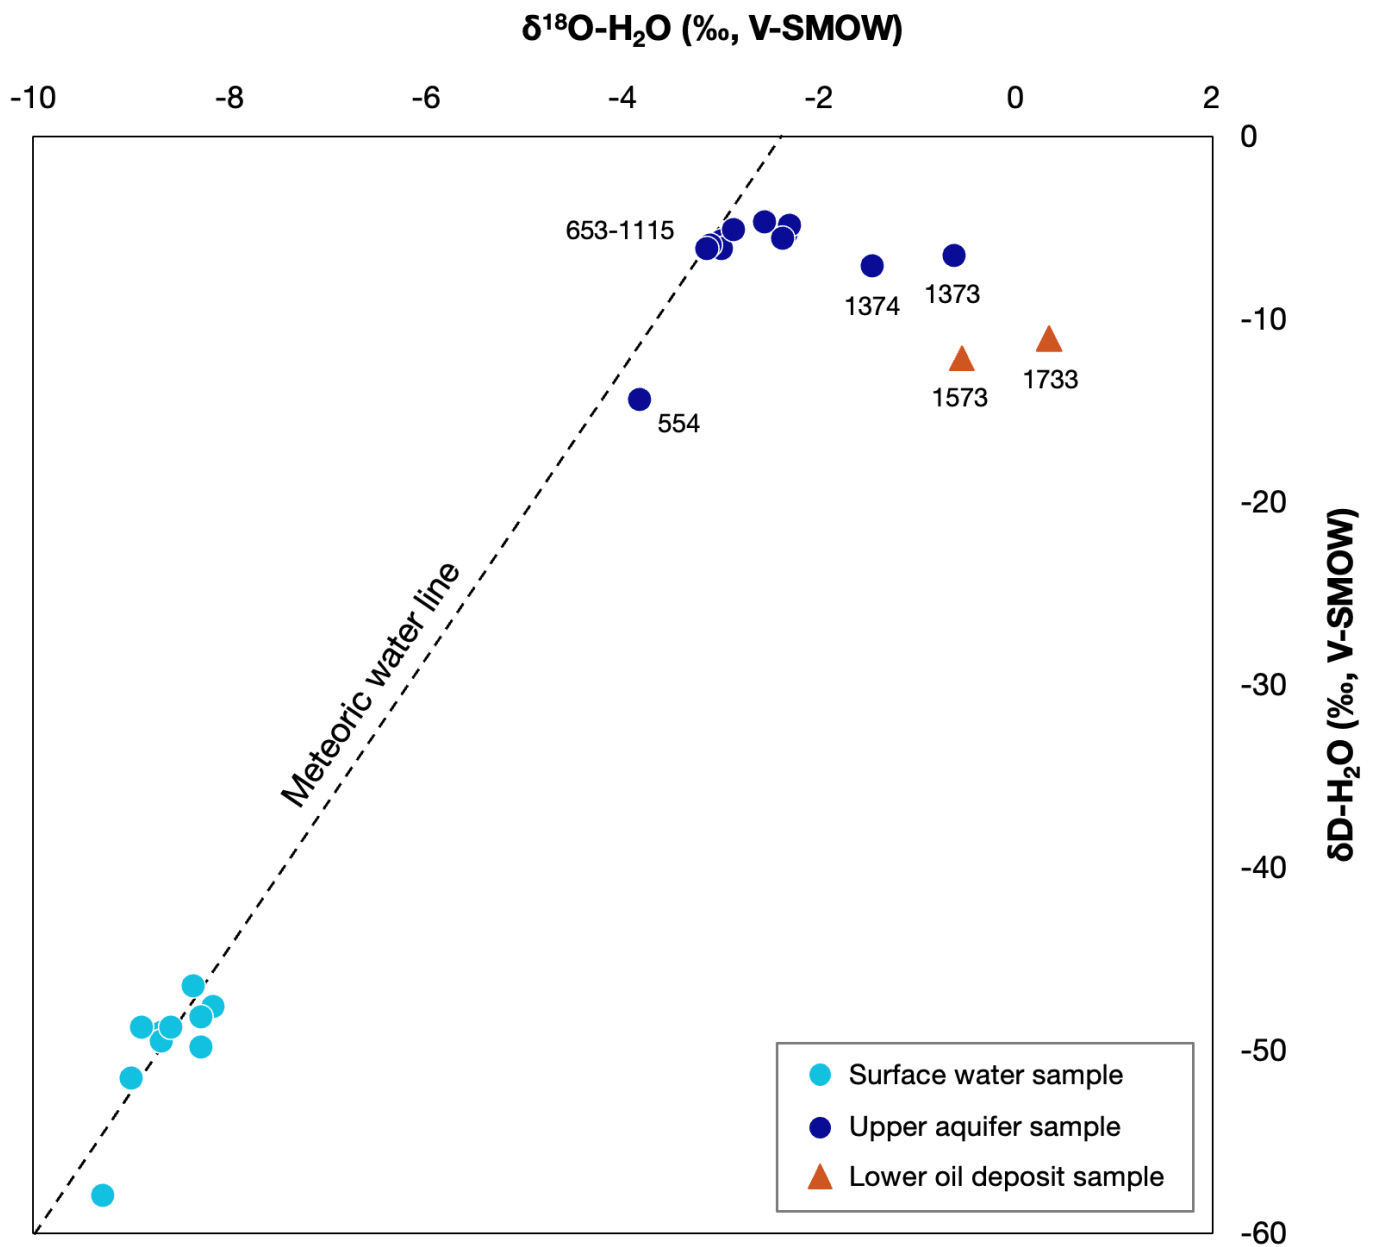

**Fig. S3.** The  $\delta\text{D}$  vs  $\delta^{18}\text{O}$  plot of formation water samples from upper aquifers and lower oil deposits (numbers indicate average depths), and surface meteoric water in the study area (Waseda and Nakai 1983). The dashed line indicates the meteoric water line in the study area determined by Kato and Kajiwara (1986).



## References

- Kato, S., and Kajiwara, Y.: Isotopic composition of hydrogen and oxygen in waters associated with oil and gas from Niigata basin, Japan. *J. Jpn. Assoc. Petrol. Technol.* 5, 113-122, <https://doi.org/10.3720/japt.51.113>, 1986.
- Milkov, A. V., and Etiope, G.: Revised genetic diagrams for natural gases based on a global dataset of >20,000 samples. *Org. Geochem.* 125, 109-120, <https://doi.org/10.1016/j.orggeochem.2018.09.002>, 2018.
- Waseda, S., and Nakai, N.: Isotopic compositions of meteoric and surface waters in central and northeast Japan. *Chikyukagaku* 17, 83-91, <https://doi.org/10.14934/chikyukagaku.17.83>, 1983.
